# Supplementary material for: Novel electronic and magnetic features in XC (X = Si and Ge) monolayers induced by doping with group-VA atoms
Source: Royal Society of Chemistry journal article supplement (doi:10.1039/d2nj05634h), 2023-01-01
Supplement: d2nj05634h1.pdf [file d2nj05634h1.pdf]

## Novel Electronic and Magnetic Features in XC (X = Si and Ge) Monolayers Induced by Doping With VA-group Atoms

Chu Viet Ha,<sup>1</sup> Duy Khanh Nguyen,<sup>2</sup> Dang Tuan Anh,<sup>1</sup> J. Guerrero-Sanchez,<sup>3</sup> and D. M. Hoat<sup>4,5,\*</sup>

<sup>1</sup>Faculty of Physics, Thai Nguyen University of Education, Thai Nguyen Province, Vietnam

<sup>2</sup>High-Performance Computing Lab (HPC Lab), Information Technology Center, Thu Dau Mot University, Binh Duong Province, Viet Nam

<sup>3</sup>Universidad Nacional Autónoma de México, Centro de Nanociencias y Nanotecnología, Apartado Postal 14, Ensenada, Baja California, Código Postal 22800, Mexico

<sup>4</sup>Institute of Theoretical and Applied Research, Duy Tan University, Ha Noi 100000, Viet Nam

<sup>5</sup>Faculty of Natural Sciences, Duy Tan University, Da Nang 550000, Viet Nam

\*Corresponding author: [dominhhoat@duytan.edu.vn](mailto:dominhhoat@duytan.edu.vn)

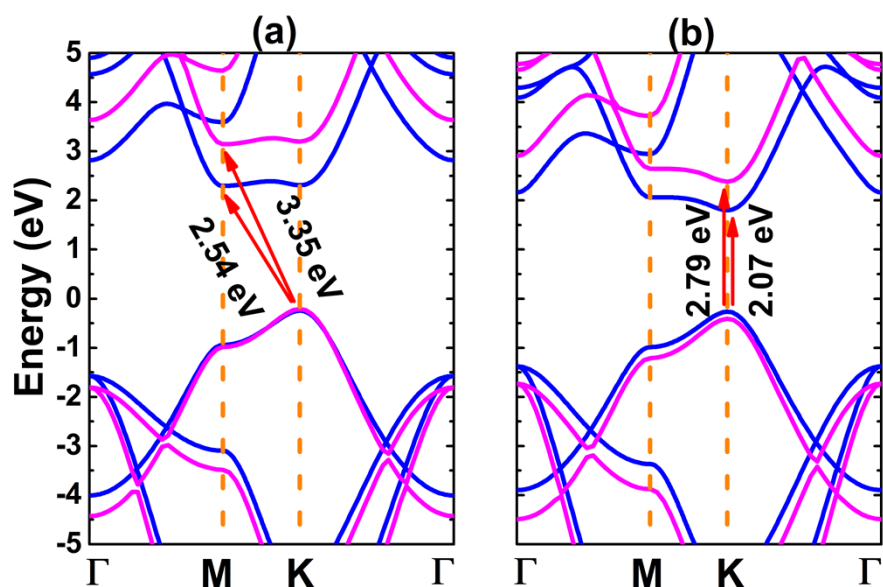

Figure S1: Electronic band structure (Blue curve: PBE; Pink curve: HSE06; The Fermi level is set to 0 eV) of (a) SiC and (b) GeC monolayer.

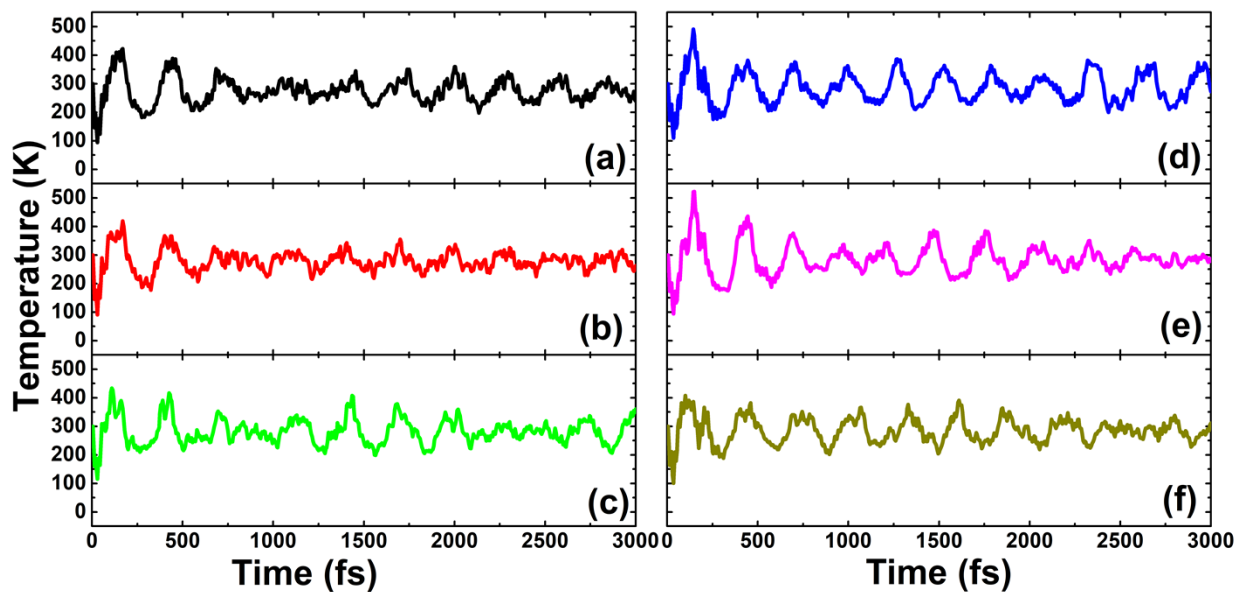

Figure S2: AIMD simulations of (a) N-, P-, and As-doped SiC monolayer; (d) N-, (e) P-, and (f) As-doped GeC monolayer at 300 K.

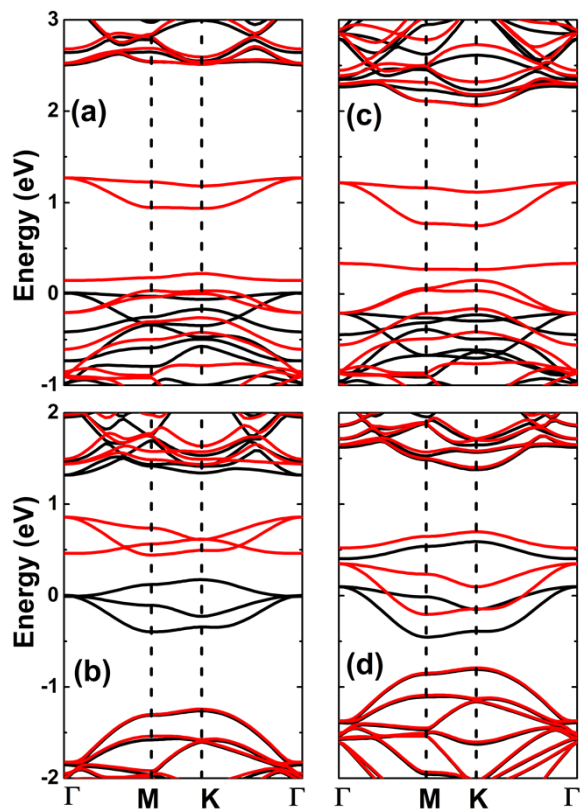

Figure S3: Electronic band structure (Spin-up: Black curve; Spin-down: Red curve; The Fermi level is set to 0 eV) of SiC monolayer with (a) Si single vacancy and (b) C vacancy, and of GeC monolayer with (c) Ge single vacancy and (d) C single vacancy.

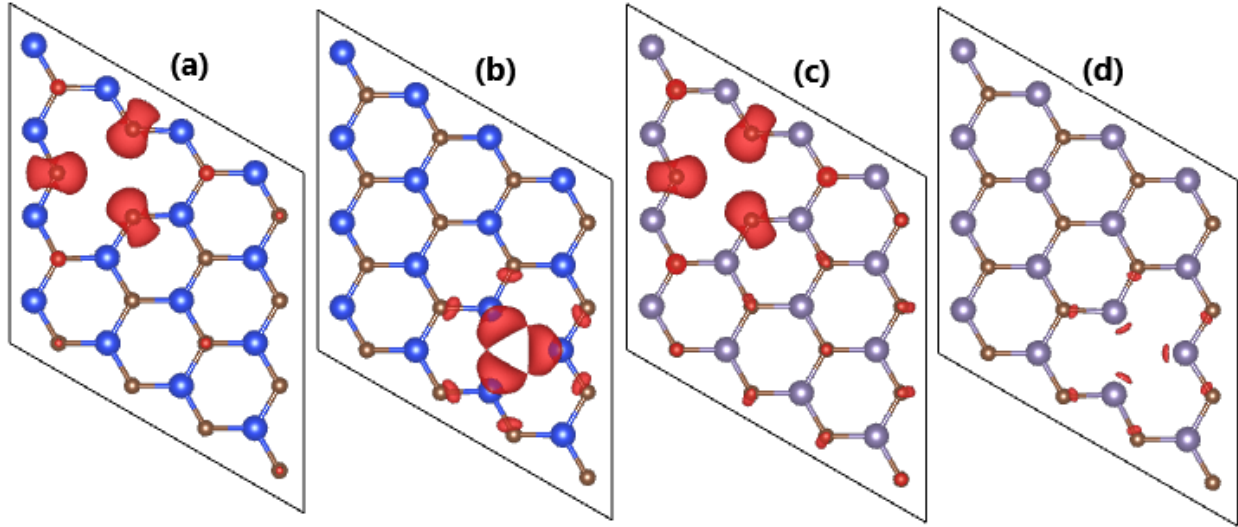

Figure S4: Spin density (Iso-surface value: 0.008; Red surface: Spin-up; Green surface: Spin-down) in SiC monolayer with (a) Si single vacancy and (b) C vacancy, and of GeC monolayer with (c) Ge single vacancy and (d) C single vacancy.

Table S1: Electronic band gap  $E_g$  (spin-up/spin-down; M = metal), Electronic character (M = metal; HM = half-metallic), and total magnetic moment  $M_t$  of SiC and GeC monolayers with single vacancies.

|                      | SiC monolayer     |                  | GeC monolayer     |           |
|----------------------|-------------------|------------------|-------------------|-----------|
|                      | Si single vacancy | C single vacancy | Ge single vacancy | C vacancy |
| $E_g$ (eV)           | M/M               | M/1.69           | 2.27/M            | M/M       |
| Electronic character | M                 | HM               | HM                | M         |
| $M_t$ ( $\mu_B$ )    | 3.19              | 2.00             | 4.00              | 0.87      |
